# Supplementary material for: Unzipped carbon nanotubes: analytical and binding applications of semisynthetic phlebotropic flavonoid, diosmin
Source: Royal Society of Chemistry journal article supplement (doi:10.1039/c5ra07497e), 2015-01-01
Supplement: c5ra07497e1.pdf [file c5ra07497e1.pdf]

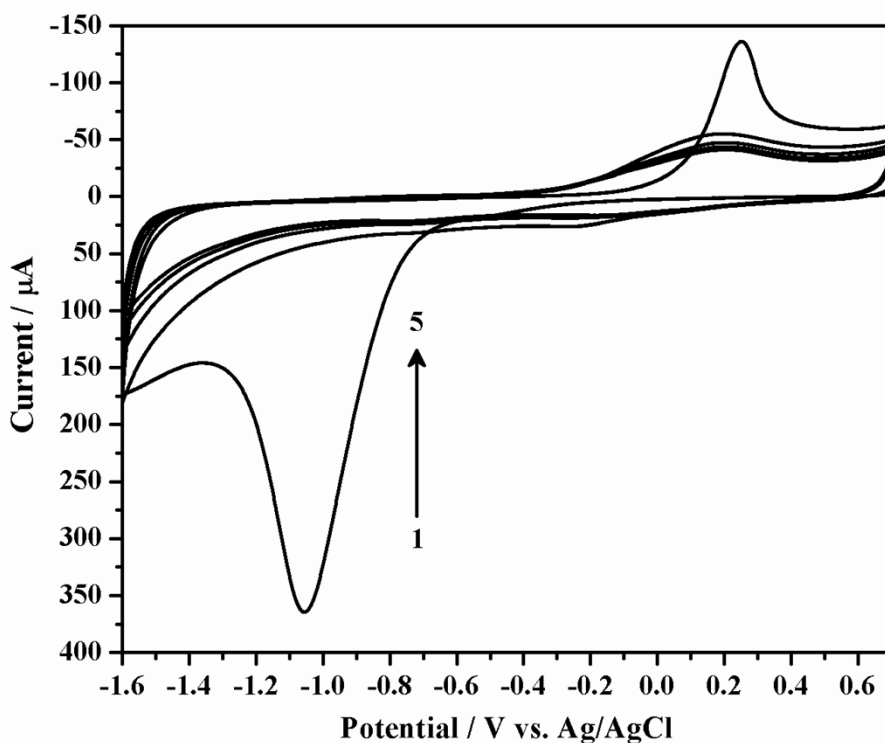

Fig. S1 Cyclic voltammograms of GONRs film at GCE in phosphate buffer of pH 6.

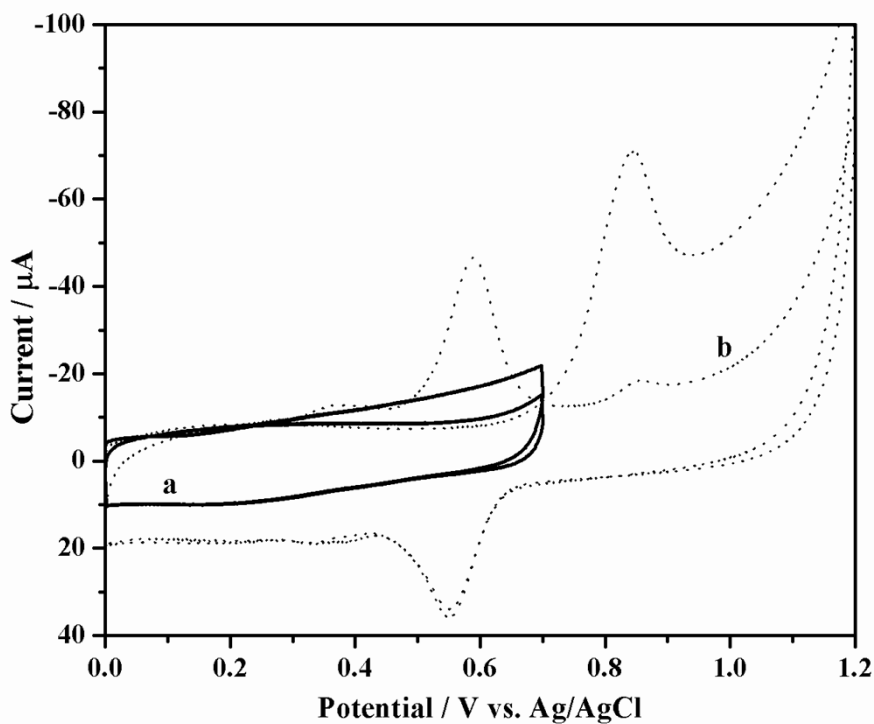

Fig. S2 Cyclic voltammograms of 10 μM DIO at ErGONRs/GCE in the potential range of 0 – 0.7 V (curves a) and 0 – 1.2 V (curves b) in phosphate buffer of pH 3.

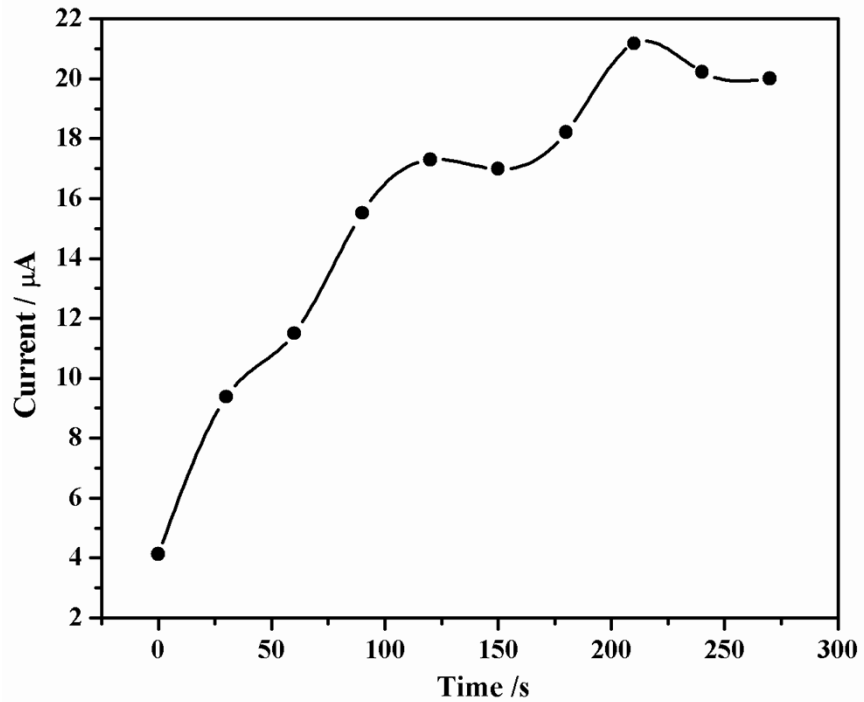

Fig. S3 Dependence of electrochemical response of DIO on the accumulation time.

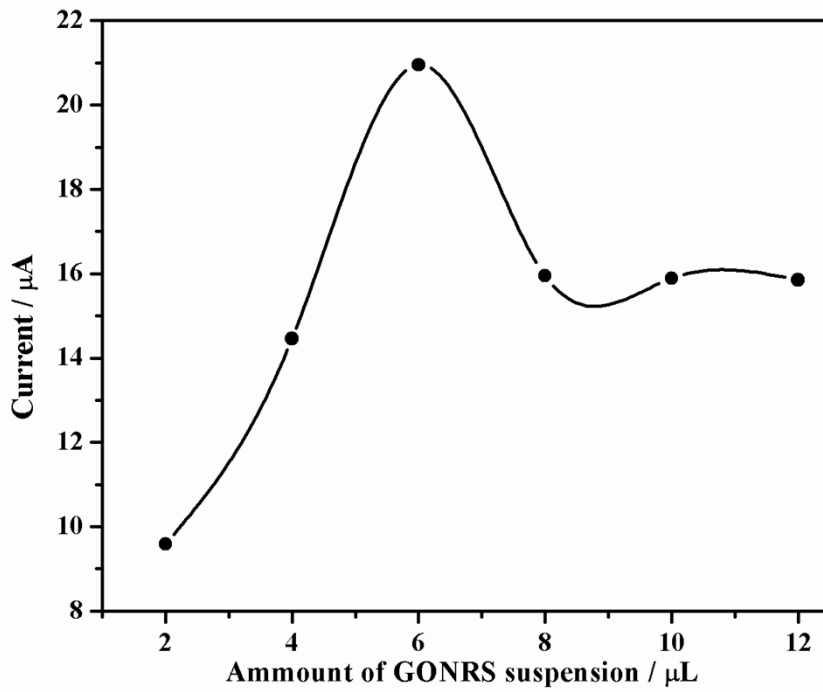

Fig. S4 Dependence of electrochemical response of DIO on the amount of GORNs suspension.
